# Supplementary material
Source: publisher figshare collection journal article supplement (https://sage.figshare.com/ndownloader/files/17992376)
Supplement: Supplementary file 1 [file 17992376]

## Appendix

Table 1. Measurement invariance test for negative exchanges across care status

|                                                                 | $\Delta\chi^2$ | $\Delta df$ | <i>P</i> value |
|-----------------------------------------------------------------|----------------|-------------|----------------|
| Weak factorial invariance (Metric invariance)                   | 11.412         | 12          | 0.490          |
| Strong factorial invariance (Scalar invariance)                 | 47.207         | 16          | <0.0001        |
| Strong partial factorial invariance (Partial scalar invariance) | 9.630          | 8           | 0.292          |

Note. We adjusted the  $\chi^2$  using the Satorra-Bentler scaling correction because  $\chi^2$  difference tests were conducted using the MLR estimator in Mplus.

Table 2. Results from the invariance test of structural paths in the APIM across care status

|                                                                                         | $\Delta\chi^2$ | $\Delta df$ | <i>P</i> value |
|-----------------------------------------------------------------------------------------|----------------|-------------|----------------|
| Wives' perceived negative interactions with husbands → Wives' depressive symptoms       | 4.574          | 2           | 0.102          |
| Husbands' perceived negative interactions with husbands → Husbands' depressive symptoms | 8.288          | 2           | 0.016          |
| Wives' perceived negative interactions with husbands → Husbands' depressive symptoms    | 3.768          | 2           | 0.152          |
| Husbands' perceived negative interactions with husbands → Wives' depressive symptoms    | 0.060          | 2           | 0.970          |

Table 3. Measurement invariance test for negative exchanges between caregivers and care-recipients

|                                                                 | $\Delta\chi^2$ | $\Delta df$ | <i>P</i> value |
|-----------------------------------------------------------------|----------------|-------------|----------------|
| Weak factorial invariance (Metric invariance)                   | 7.304          | 8           | 0.504          |
| Strong factorial invariance (Scalar invariance)                 | 59.460         | 6           | <0.0001        |
| Strong partial factorial invariance (Partial scalar invariance) | 5.384          | 3           | 0.146          |

Note. We adjusted the  $\chi^2$  using the Satorra-Bentler scaling correction because  $\chi^2$  difference tests were conducted using the MLR estimator in Mplus.

Table 4. Results from the Wald test of path constraints in the APIM between men and women

|                                                                                                         | Wald test statistics | df | <i>P</i> value |
|---------------------------------------------------------------------------------------------------------|----------------------|----|----------------|
| Caregivers' perceived negative interactions with care recipients → Caregivers' depressive symptoms      | 11.900               | 1  | 0.001          |
| Care recipients' perceived negative interactions with caregivers → Care recipients' depressive symptoms | 1.234                | 1  | 0.266          |
| Caregivers' perceived negative interactions with care recipients → Care recipients' depressive symptoms | 1.699                | 1  | 0.192          |
| Care recipients' perceived negative interactions with caregivers → Caregivers' depressive symptoms      | 0.035                | 1  | 0.851          |
